# Supplementary material
Source: PubMed Central journal article supplement (PMC4162635)
Supplement: NIHMS550007-supplement-supplement_1.pdf [file NIHMS550007-supplement-supplement_1.pdf]

## Supplemental material

### *Literature search details*

#### Guideline searches

##### 1. NATIONAL GUIDELINE CLEARINGHOUSE

| Keyword     | Results | Retrieved | Included |
|-------------|---------|-----------|----------|
| ECMO        | 0       | 0         | 0        |
| Oxygenation | 81      | 1         | 0        |

##### 2. MEDLINE

| Search | Syntax                                                     | Results | Retrieved | Included |
|--------|------------------------------------------------------------|---------|-----------|----------|
| 1      | ECMO.mp. or exp Extracorporeal Membrane Oxygenation/       | 3,892   | –         | –        |
| 2      | guideline.mp. or exp guideline/ or exp practice guideline/ | 42,307  | –         | –        |
| 3      | 1 and 2                                                    | 9       | 0         | 0        |

##### 3. EMBASE

| Search | Syntax                              | Results | Retrieved | Included |
|--------|-------------------------------------|---------|-----------|----------|
| 1      | 'extracorporeal oxygenation'/exp/mj | 2,037   | –         | –        |
| 2      | 'practice guideline'/exp/mj         | 11,415  | –         | –        |
| 3      | 1 and 2                             | 0       | 0         | 0        |

##### 4. ADDITIONAL SOURCES SEARCHED OR BROWSED

| Database or source                  | Keyword | Hits | Included |
|-------------------------------------|---------|------|----------|
| NICE (UK)                           | Browsed | 1    | 1        |
| AHRQ Evidence-based practice series | Browsed | 0    | 0        |

## Searches for systematic reviews

### 1. MEDLINE

| Search | Syntax                                               | Results | Retrieved | Included |
|--------|------------------------------------------------------|---------|-----------|----------|
| 1      | ECMO.mp. or exp Extracorporeal Membrane Oxygenation/ | 3,892   | –         | –        |
| 2      | Limit to "review articles" and English language      | 542     | 15        | 2        |

### 2. COCHRANE LIBRARY

| Keyword                                  | Reviews | Retrieved | Included |
|------------------------------------------|---------|-----------|----------|
| exp Extracorporeal Membrane Oxygenation/ | 1       | 0         | 0        |

### 3. DARE (DATABASE OF ABSTRACTS OF REVIEWS OF EFFECTS)

| Keyword                                  | Reviews | Retrieved | Included |
|------------------------------------------|---------|-----------|----------|
| exp Extracorporeal Membrane Oxygenation/ | 1       | 1         | 1        |

### 4. HTA (HEALTH TECHNOLOGY ASSESSMENT)

| Keyword                                  | Technology assessments | Retrieved | Included |
|------------------------------------------|------------------------|-----------|----------|
| exp Extracorporeal Membrane Oxygenation/ | 8                      | 1         | 1        |

### 5. EMBASE

| Search | Syntax                                     | Results | Retrieved | Included |
|--------|--------------------------------------------|---------|-----------|----------|
| 1      | 'extracorporeal oxygenation'/exp/mj        | 2,037   | –         | –        |
| 2      | Limit to review articles, English language | 142     | 1         | 0        |

Seven additional references duplicated retrieved articles from the Medline search.

## 6. INAHTA MEMBER HEALTH TECHNOLOGY ASSESSMENT AGENCIES

| Database or source           | Keyword        | Hits | Retrieved | Included |
|------------------------------|----------------|------|-----------|----------|
| AETMIS (Québec)              | ECMO           | 1    | 0         | 0        |
| AETS (Spain)                 | Browsed        | 0    | 0         | 0        |
| CADTH (Canada)               | ECMO           | 20   | 1         | 0        |
| CAHTA (Spain)                | ECMO           | 15   | 0         | 0        |
| CEDIT (France)               | Browsed        | 0    | 0         | 0        |
| CENETEC (Mexico)             | Browsed        | 0    | 0         | 0        |
| CRD (UK)                     | Browsed        | 0    | 0         | 0        |
| CVZ (Netherlands)            | Browsed        | 0    | 0         | 0        |
| DIHTA (Germany)              | ECMO           | 38   | 0         | 0        |
| ECRI (USA)                   | ECMO           | 9    | 1         | 1        |
| Finnohta (Finland)           | Browsed        | 0    | 0         | 0        |
| GR (Netherlands)             | Extracorporeal | 3    | 0         | 0        |
| HAS (France)                 | Browsed        | 0    | 0         | 0        |
| INAHTA (International)       | Extracorporeal | 4    | 0         | 0        |
| MAS (Canada)                 | Browsed        | 0    | 0         | 0        |
| MSAC (Australia)             | Extracorporeal | 3    | 0         | 0        |
| NETSCC (formerly NCCHTA, UK) | ECMO           | 5    | 1         | 1        |
| NHS QIS (Scotland)           | Extracorporeal | 9    | 0         | 0        |
| NHSC (UK)                    | ECMO           | 4    | 0         | 0        |
| NICE (UK)                    | Browsed        | 2    | 1         | 1        |
| NOKC (Norway)                | Browsed        | 0    | 0         | 0        |
| OSTEBA (Spain)               | Browsed        | 0    | 0         | 0        |
| SBU (Sweden)                 | Browsed        | 0    | 0         | 0        |
| UETS (Spain)                 | Browsed        | 0    | 0         | 0        |
| VA TAP (USA)                 | Browsed        | 0    | 0         | 0        |

## Searches for primary studies

### 1. MEDLINE

| Search | Syntax                                               | Results | Retrieved | Included |
|--------|------------------------------------------------------|---------|-----------|----------|
| 1      | ECMO.mp. or exp Extracorporeal Membrane Oxygenation/ | 3,892   | –         | –        |
| 2      | exp Influenza, Human/                                | 22,102  | –         | –        |
| 3      | H1N1.mp.                                             | 3,230   | –         | –        |
| 4      | 1 and (2 or 3)                                       | 7       | 0         | 0        |

### 2. EMBASE

| Search | Syntax                              | Results | Retrieved | Included |
|--------|-------------------------------------|---------|-----------|----------|
| 1      | 'extracorporeal oxygenation'/exp/mj | 2,038   | –         | –        |
| 2      | influenza/exp                       | 32,191  | –         | –        |
| 3      | H1N1                                | 2,156   | –         | –        |
| 4      | 1 and (2 or 3)                      | 2       | 0         | 0        |

## ***Evidence quality rating scale for randomized controlled trials***

### Randomization:

1. J Described as randomized?
2. J Randomization appropriately performed?

### Blinding:

3. J Study described as double-blinded?
4. C Outcome assessor blinded?
5. J Study participant blinded (e.g. intervention described as indistinguishable, active placebo, identical placebo or dummy)?
6. C Investigator blinded?

### Patient attrition:

7. J Attrition described?
8. C Attrition smaller than 10-15% of assigned patients?
9. C Attrition appropriately analyzed (i.e. intention-to-treat analysis for superiority studies)?

J—components from original Jadad scale (10); C—components from Chalmers list (11)
